# Supplementary material
Source: publisher site journal article supplement (https://www.dovepress.com/get_supplementary_file.php?f=408423.docx)
Supplement: Supplementary file 1 [file get_supplementary_file.php]

**Supplemental File 1. CONSORT checklist for Pragmatic trials**

**Checklist of items for reporting pragmatic trials**

| Section | Item | Standard CONSORT description | Extension for pragmatic trials |  |
| --- | --- | --- | --- | --- |
| Title and abstract | 1 | How participants were allocated to interventions (eg, “random allocation,” “randomised,” or “randomly assigned”) |  | **Providing choice in pulmonary rehabilitation: Results from a preference clinical trial of centre based and mHealth delivered rehabilitation** |
| **Introduction** |  |  |  |  |
| Background | 2 | Scientific background and explanation of rationale | Describe the health or health service problem that the intervention is intended to address and other interventions that may commonly be aimed at this problem | Pg 4. PR improve outcomes for CRD, but too few people attend or complete. Utilising technology may provide a solution however is this preferred by people living a CRD. |
| **Methods** |  |  |  |  |
| Participants | 3 | Eligibility criteria for participants; settings and locations where the data were collected | Eligibility criteria should be explicitly framed to show the degree to which they include typical participants and/or, where applicable, typical providers (eg, nurses), institutions (eg, hospitals), communities (or localities eg, towns) and settings of care (eg, different healthcare financing systems) | Pg 6 describes participant recruitment and further information provided in supplemental information. |
| Interventions | 4 | Precise details of the interventions intended for each group and how and when they were actually administered | Describe extra resources added to (or resources removed from) usual settings in order to implement intervention. Indicate if efforts were made to standardise the intervention or if the intervention and its delivery were allowed to vary between participants, practitioners, or study sites | Three study sites centre-based programme was standard, but location varied – see supplemental. The programmes followed best practise guidelines (1).  See pg 6-7 and supplement 1. |
| Describe the comparator in similar detail to the intervention | See pg 6 and supplement 1. |
| Objectives | 5 | Specific objectives and hypotheses |  | Pg 9 |
| Outcomes | 6 | Clearly defined primary and secondary outcome measures and, when applicable, any methods used to enhance the quality of measurements (eg, multiple observations, training of assessors) | Explain why the chosen outcomes and, when relevant, the length of follow-up are considered important to those who will use the results of the trial | Pg 8-9  Time of follow based on end intervention  Outcome measure chosen reflect measures used in clinical practise |
| Sample size | 7 | How sample size was determined; explanation of any interim analyses and stopping rules when applicable | If calculated using the smallest difference considered important by the target decision maker audience (the minimally important difference) then report where this difference was obtained | Page 9 |
| Randomisation—sequence generation | 8 | Method used to generate the random allocation sequence, including details of any restriction (eg, blocking, stratification) |  | n/a |
| Randomisation—allocation concealment | 9 | Method used to implement the random allocation sequence (eg, numbered containers or central telephone), clarifying whether the sequence was concealed until interventions were assigned |  | n/a |
| Randomisation—implementation | 10 | Who generated the allocation sequence, who enrolled participants, and who assigned participants to their groups |  | n/a |
| Blinding (masking) | 11 | Whether participants, those administering the interventions, and those assessing the outcomes were blinded to group assignment | If blinding was not done, or was not possible, explain why | Pg 6  Assessments completed by blinded assessor. Not possible to blind participants.  Not possible to blind follow-up assessor as telephone based. |
| Statistical methods | 12 | Statistical methods used to compare groups for primary outcomes; methods for additional analyses, such as subgroup analyses and adjusted analyses |  | Pg 8-9 |
| **Results** |  |  |  |  |
| Participant flow | 13 | Flow of participants through each stage (a diagram is strongly recommended)—specifically, for each group, report the numbers of participants randomly assigned, receiving intended treatment, completing the study protocol, and analysed for the primary outcome; describe deviations from planned study protocol, together with reasons | The number of participants or units approached to take part in the trial, the number which were eligible, and reasons for non-participation should be reported | See Figure 1 at end of manuscript. |
| Recruitment | 14 | Dates defining the periods of recruitment and follow-up |  | Pg 5 |
| Baseline data | 15 | Baseline demographic and clinical characteristics of each group |  | Table 1 |
| Numbers analysed | 16 | Number of participants (denominator) in each group included in each analysis and whether analysis was by “intention-to-treat”; state the results in absolute numbers when feasible (eg, 10/20, not 50%) |  | Pg 10 and Figure 1 |
| Outcomes and estimation | 17 | For each primary and secondary outcome, a summary of results for each group and the estimated effect size and its precision (eg, 95% CI) |  | Pg 10-11 for primary outcome  Table 3 for secondary outcome |
| Ancillary analyses | 18 | Address multiplicity by reporting any other analyses performed, including subgroup analyses and adjusted analyses, indicating which are prespecified and which are exploratory |  | There were no subgroup analyses |
| Adverse events | 19 | All-important adverse events or side effects in each intervention group |  | Pg 11 |
| **Discussion** |  |  |  |  |
| Interpretation | 20 | Interpretation of the results, taking into account study hypotheses, sources of potential bias or imprecision, and the dangers associated with multiplicity of analyses and outcomes |  | Pg 10 - 12 |
| Generalisability | 21 | Generalisability (external validity) of the trial findings | Describe key aspects of the setting which determined the trial results. Discuss possible differences in other settings where clinical traditions, health service organisation, staffing, or resources may vary from those of the trial | Pg 11 - 14 |
| Overall evidence | 22 | General interpretation of the results in the context of current evidence |  | Pg 11-13 |

***Cite as:*** *Zwarenstein M, Treweek S, Gagnier JJ, Altman DG, Tunis S, Haynes B, Oxman AD, Moher D for the CONSORT and Pragmatic Trials in Healthcare (Practihc) group. Improving the reporting of pragmatic trials: an extension of the CONSORT statement. BMJ 2008; 337;a2390.*

Supplemental File 2. TIDieR Checklist

| **SECTION 1. BRIEF NAME** | |
| --- | --- |
| Item 1. | Centre-based or mHealth delivered pulmonary rehabilitation. |
| **SECTION 2. WHY** | |
| Item 2. | PR is an evidence-based intervention which has been shown to reduce dyspnoea, dependency and hospitalisation while improving exercise capacity and health related quality of life for people living with a chronic respiratory disorder (CRD) (1). Despite the proven efficacy the access, uptake and completion of PR is low worldwide. Emerging models are being developed to address this and mHealth is one such model. This pragmatic trial aims to understand the patient preference for how PR is delivered and if mHealth PR can improve completion rates of PR. |
| **SECTION 3. WHAT** | |
| Item 3A. | Patients who opted for the mPR group were required to have access to a mobile phone. The mPR-app was downloaded onto the phone by a research assistant. The participant was shown how to use the app and provided with a paper manual to take home with further information if required. Participants had the option of wearing a commercially available sensor (Fitbit or withings) which was loaned to them for the study period. If they chose this option, the research assistant linked the sensor to the app and showed the participant how to use the sensor.  At the initial assessment, participants were orientated to the 8-week programme and shown the exercise programme. Each exercise was demonstrated, and the participants technique checked by the physiotherapist. |
| Item 3B. | Centre based PR  Participants who opted for the centre-based intervention were to attend the centre two days per week for eight weeks. The intervention included one hour of supervised exercise training in a group setting delivered by a multidisciplinary team. Exercise prescription included aerobic, resistance and balance exercises individually prescribed and completed in a circuit programme. Participants were provided with a home-based exercise programme, which they were asked to complete three times per week and record in the provided activity diary. In addition, participants were encouraged to attend a 30-minute group education session with focus on self-management education. The centre-based PR intervention follows standard clinical practise.  mPR  mPR participants were to complete an 8-week home-based PR programme delivered through mHealth (mPR). All exercises were demonstrated to participants at the baseline assessment and technique checked for safety by the PR physiotherapist. Participants had the option of an alternative exercise if one or more of the exercises were difficult or caused discomfort. Completion of the exercises was recorded in the mPR-app and participants could track their exercise completion via the ‘my progress page’. Participants in the mPR group received self-management education via self-directed modules on the mPR-app and were sent up to two SMS messages per day. The content of the self-management education was developed and reviewed by the multi-disciplinary team who were involved in the delivery of the centre-based programme. |
| **SECTION 4. WHEN** | |
| * Item 4. | All participants referred to and eligible for PR were offered the opportunity to participate and given the choice of centre-based or mHealth deliver (mPR) PR. Participants with mild, moderate and severe CRD were included.  The three recruiting centres each had waiting lists of people for PR and this varied from 6 weeks to 5 months in duration. |
| **SECTION 5. WHO PROVIDED** | |
| Item 5. | The initial assessment was completed by a respiratory nurse specialist (minimum five years’ experience) and an experienced physiotherapist (minimum 3 years’ experience). Two research assistants (RA), both with prior research experience assisted in the trial.  A two-hour in person training workshop was held prior to the commencement of the trial for all staff involved in the research. This training ensured all the staff were familiar with their roles and responsibilities for the ethical and safe implementation of the study. |
| **SECTION 6. HOW** | |
| Item 6A. | Centre-based.  The exercise component was conducted in groups of ten to twelve participants and involved a circuit class. Exercises were individually prescribed based on initial assessment. Each group was supervised by a minimum of three staff members (physiotherapists/nurses).  mPR  The mPR group had the choice of SMS with paper manual, mPR-app and a wearable sensor. The mPR-app is a progressive web app and could be accessed on a mobile phone, tablet or computer. Participants could download the mPR-app to more than one device. All participants received a daily SMS. |
| * Item 6B. | Centre-based PR is standard practise and follows best practise guidelines.  The mPR programme included daily SMS to participants which were personalised and positively framed, aiming to encourage and support participants with their programme. |
| **SECTION 7. WHERE** | |
| * Item 7. | All participants completed an initial assessment at a location provided by the recruiting centre. For the centre-based group the intervention occurred at the same site as the assessment and included community sports facilities, community gym and hospital outpatient departments.  The mPR group completed all the intervention at home.  The follow-up assessment was completed at the same site as initial assessment for both groups until COVID-19 restrictions were implemented and were completed via telephone during this period. |
| **SECTION 8. HOW MUCH** | |
| * Item 8A. | For both groups the intervention was 8 weeks in duration.  The centre-based group attended twice per week and each session was 90 minutes in duration. This included 60 minutes of exercise and 30 minutes of education. Participants were asked to complete a home-based programme on another three days per week and the programme took approx. 30 minutes to complete.  The mPR group exercise programme took between 45 to 60 minutes to complete. This was to be completed on five days of the week. Participants could complete the exercise on any day or time which suited their schedule. They were encouraged to view all the modules on the tips and tools page but advised they could do this at any time over the 8 weeks.  During the COVID-19 restrictions, centre-based participants were offered telephone or videoconference (zoom) based options. The telephone calls were once weekly and lasted between 20 and 40 minutes. The zoom exercise class was twice weekly for 60 – 90 minutes in duration. |
| * Item 8B. | The intervention was 8-weeks in duration but could be paused if unwell. Therefore, participants had up to 12-weeks to complete in both groups. |
| * Item 8C. | Twice weekly to centre-based, with 3 home-based exercise sessions encouraged.  Five times per week for mPR. |
| * Item 8D. | Both groups involved an eight week intervention |
| **SECTION 9. HOW CHALLENGING** | |
| * Item 9. | For the centre-based group intensity of exercise is prescribed based on the modified BORG scale with all participants encouraged to progress exercise to maintain a breathlessness score of 3 – 4 (2)  The mPR group also used the BORG scale as a guide of intensity. This was taught to participants in the initial assessment and further information on the scale was provided in the paper manual provided and on the mPR-app tips and tools page. |
| **SECTION 10. REGRESSION/PROGRESSION** | |
| * Item 10. | Centre-based  The centre-based programme was reviewed and progressed at midway point by the site physiotherapist.  mPR  Participants were sent a SMS at the end of each week asking them if they were ready to progress their exercise programme. If they answered Yes, a progressed exercise plan was sent, if they replied NO the same exercise plan was sent via SMS and available on the mPR-app. The exercise progression was duration of aerobic exercise one week and number of resistances exercises the alternate week. At the midway point, the exercises changed, and new exercises were prescribed. |
| **SECTION 11. PERSONALISATION** | |
| * Item 11. | mPR  Each participant enrolled in the mPR programme received a personally tailored package of text messages over the 8-week period, in addition to mPR-app. The programme consisted of different modules to allow content to be tailored to individual clinical characteristics, preferences and demographics. All participants received a core programme. In addition, optional modules were available for smokers, participants with low BMI and participants with retained or excess respiratory secretions. |
| **SECTION 12. PROTOCOL DEVIATION** | |
| * Item 12. | Sample size.  Due to COVID-19 restrictions recruitment was stopped early. The target sample size was 50 in the smallest group and at recruitment end there were 67 centre-based and 38 mPR.  Intervention  Part way through the study period, National restrictions were imposed due to the COVID-19 pandemic meaning face-to-face research and all centre-based services were required to pivot to telehealth options. Following consultation with the primary research team (DT, JR, RW, RD, EU SC) the following deviations from the protocol were implemented:   - Centre-based PR (standard care): all participants were contacted and offered whatever home-based options their study centre provided, which were either via weekly telephone calls or twice weekly teleconference class. These interventions continued until participants had completed their eight-week PR programme. The video conference classes were 60 minutes in duration and included warm up and cool downs plus, aerobic, resistance and balance exercises. The intensity of exercises was based on BORG dyspnoea scale as had been used in the centre-based programme. Telephone calls were made by a member of the PR team and included a review of home-based exercise programme and discussion around the self-management education topics. Additional information was sent to patients in paper copy or via email. - mPR: An additional ad hoc SMS message was sent to all participants during the national restrictions. There were no others changes to the mPR intervention.   Outcome Measures  The follow-up assessment was completed over the telephone which meant the exercise capacity (6-minute walk test and one minute sit to stand) could not be assessed. |
| **SECTION 13. HOW WELL** | |
| * Item 13A. | Centre-based PR  If a participant was unwell or unable to attend the programme, they could pause the programme. They had a maximum of 12 weeks to complete the programme. The number of sessions they attended was recorded (out of a maximum of 16) and the number of sessions they missed (DNA). After 12 weeks the reassessment was completed independent of the number of sessions attended.  If a participant did not attend two sessions in a row without pausing the programme, they were called by a staff member. If they did not attend a further two sessions, a second phone call was made.  If the participant did not attend, they were still called at the end of the eight weeks and invited to complete a follow-up assessment. If the participant declined the follow up assessment or was unable to be contacted, they were considered lost to follow up.  mPR  If participants were unwell or unable to complete the programme, they could pause the intervention. They had a maximum of 12 weeks to complete the programme. Attendance in the mPR programme was recorded as the number of messages participants replied to during the 8-week intervention (out of a maximum of 16). Participants were advised they are to reply to TWO question messages per week (number of times they have completed exercises, and ready to progress exercise programme).  If the participant did not reply to either of the SMS messages which require response in week ONE they received an ad hoc SMS reminding them to reply. If the participant was unwell, they were reminded they can pause the programme.  If they still did not reply to the SMS a second ad-hoc message was sent.  If the participant replied to the messages at week one but did not reply to two consecutive messages on a later week, they received one ad-hoc SMS reminding them to reply. If the participant still did not reply they were called at the end of the eight weeks and invited to complete a follow up assessment.  If the participant declined the follow up assessment or was unable to be contacted the participant was considered lost to follow up. |
| * Item 13B. | The engagement with the centre-based group was assessed in person (zoom or telephone calls). For the mPR group, engagement was assessed via response to two SMS questions. Further assessment of engagement included systems recorded data for the mPR-app group only, which included log ins and pages viewed on the mPR-app. |
| **SECTION 14. ADVERSE EVENTS** | |
| * Item 14A. | All participating centres and staff were advised of the adverse events reporting process. This required immediate communication with the principal investigator and documentation of the incident. An adverse events register was set up in the trial manual. |
| * Item 14B. | One serious adverse event occurred during the trial period. One participant from the mPR group fell while out walking and injured her shoulder. The participant was unable to complete the intervention but was able to complete the follow-up assessment. |

**Supplemental Information 3. CONSORT for COVID impacted trials**

# CONSERVE Checklists

| CONSERVE-CONSORT Extension: | | | | | |
| --- | --- | --- | --- | --- | --- |
| Item | Item Title | Description | | | Page No. |
| I. | Extenuating Circumstances | Describe the circumstances and how they constitute extenuating circumstances. National lockdown was implemented on 17 August due to COVID-19 pandemic. | | | 5 |
| II. | Important Modifications | 1. Describe how the modifications are important modifications.   Recruitment stopped – short of proposed sample size.  Centre-based PR pivoted to telephone /VC  Follow up assessments were completed via phone therefore no physical measures (6MWT + sit to stand tests) were completed. | | | 5  5 |
| 1. Describe the impacts and mitigating strategies, including their rationale and implications for the trial. | | | (see below) |
| 1. Provide a modification timeline.   Recruitment and traditional centre-based classes stopped on 17 August.  All centre-based interventions changed from 17 August  Follow up assessments occurred over the phone | | | 5 - 6  9 |
| III. | Responsible Parties | State who planned, reviewed and approved the modifications. Research team | | | 5 |
| IV. | Interim data | If modifications were informed by trial data, describe how the interim data were used, including whether they were examined by study group, and whether the individuals reviewing the data were blinded to the treatment allocation. | | | n/a |
| CONSORT Number and Item | | For each row, if important modifications occurred check “direct impact” and/or “mitigating strategy” and describe the changes in the trial manuscript or supplement. Check “no change” for items that are unaffected in the extenuating circumstance. | | | Page No. |
| No Change | Impact* | Mitigating Strategy** |
| 1 | Title and abstract | No change |  |  |  |
| 2 | Introduction | No change |  |  |  |
| 3 | Methods: Trial Design | No change |  |  |  |
| 4 | Methods: Participants |  | Reduced sample size |  | 5 |
| 5 | Methods: Interventions |  | Usual care treatment protocols unexpectedly altered mid trial | Centre based group – forced to stop face to face classes and transition to phone or videoconferencing | 6 |
| 6 | Methods: Outcomes |  | Phone based follow up assessments  No exercise tests. | Phone based follow up assessments  No exercise tests. | 5 |
| 7 | Methods: Sample Size |  | Change in sample size | Reduced from 50 in smallest group to 38. Statistical model for primary outcomes is no longer powered at 80% due to reduced sample size. | 14 |
| 8-10 | Methods: Randomisation | No change |  |  |  |
| 11 | Methods: Blinding |  | Change in blinding of physio at follow up assessment | No blinding possible due to phone assessment. | 14 |
| 12 | Methods: Statistical methods | No change |  |  |  |
| 13 | Results: Participant flow |  |  |  |  |
| 14 | Results: Recruitment |  | Reduced recruitment |  | 14 |
| 15 | Results: Baseline data | No change |  |  |  |
| 16 | Results: Numbers analysed | No change |  |  |  |
| 17 | Results: Outcomes and estimation |  |  |  |  |
| 18 | Results: Ancillary analyses |  |  |  | n/a |
| 19 | Results: Harms | No change |  |  |  |
| 20 | Discussion: Limitations |  | Changes to centre-based intervention |  | 14 |
| 21 | Discussion: Generalisability |  | The change to phone calls and social circumstances may have impacted the completion rate for centre-based |  | 11 |
| 23 | Other information: Registration |  |  |  |  |
| 24 | Other information: Protocol |  |  |  |  |
| 25 | Other information: Funding | No change |  |  |  |
| *Aspects of the trial that are directly affected or changed by the extenuating circumstance and are not under the control of investigators, sponsor or funder.  **Aspects of the trial that are modified by the study investigators, sponsor or funder to respond to the extenuating circumstance or manage the direct impacts on the trial. | | | | | |
